# Supplementary material for: Pressure-induced silk spinning mechanism in webspinners (Insecta: Embioptera)
Source: Royal Society of Chemistry journal article supplement (doi:10.1039/c9sm01782h), 2019-01-01
Supplement: c9sm01782h2.pdf [file c9sm01782h2.pdf]

## Supplement

**Supplemental figure 1:** Diagram of the relative occurrence of mistakes (surface contact) during forward and backward running (n = 19 individuals).

**Supplemental table 1:** Detailed data for forwards and backwards running.

**Supplemental video 1:** Spinning manipulation experiment.

**Supplemental video 2:** Forwards running with and without mistake.

**Supplemental video 3:** Backwards running with and without mistake.
