# Supplementary material for: Pressure-induced silk spinning mechanism in webspinners (Insecta: Embioptera)
Source: Royal Society of Chemistry journal article supplement (doi:10.1039/c9sm01782h), 2019-01-01
Supplement: c9sm01782h6.xlsx [file c9sm01782h6.xlsx]

## Sheet: summary mistakes females only
individuals	N Rows	Sum(#steps back)	Sum(#mistakes back)	Prop mistakes backwards	Arcsin sqrt backwards prop	Sum(#steps forward)	Sum(#mistakes forward)	Prop mistakes forwards
#	5	26	2	0.0769231	0.281035	5	0	0
a	7	33	13	0.393939	0.678526	11	0	0
b	5	21	1	0.047619	0.219988	5	0	0
d	5	25	12	0.48	0.765393	0	0
e	4	13	4	0.307692	0.588003	0	0
f	6	21	3	0.142857	0.387597	6	2	0.333333
k	6	27	6	0.222222	0.490883	5	0	0
m	6	30	11	0.366667	0.650432	21	0	0
n	5	15	10	0.666667	0.955317	10	0	0
p	6	27	14	0.518519	0.803921	14	0	0
r	5	25	10	0.4	0.684719	10	0	0
s	5	25	12	0.48	0.765393	3	0	0
t	5	24	0	0	0	6	0	0
u	5	18	0	0	0	5	0	0
v	5	25	8	0.32	0.601264	6	1	0.166667
w	5	25	13	0.52	0.805404	6	0	0
x	5	27	11	0.407407	0.692268	0	0
y	6	31	4	0.129032	0.367422	0	0
z	6	28	7	0.25	0.523599	3	0	0
	102	466				116
