# Supplementary figures and images for: Pressure-induced silk spinning mechanism in webspinners (Insecta: Embioptera)
Source: Royal Society of Chemistry journal article supplement (doi:10.1039/c9sm01782h), 2019-01-01

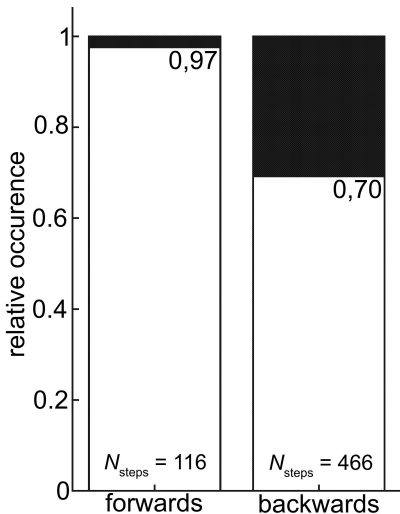

Supplement: c9sm01782h1.pdf [file c9sm01782h1.pdf]
